# Supplementary material for: Growth of carbon nanoshells on tungsten carbide for loading Pt with enhanced electrocatalytic activity and stable anti-poisoning performance
Source: Royal Society of Chemistry journal article supplement (doi:10.1039/c6ra12475e), 2016-01-01
Supplement: c6ra12475e1.pdf [file c6ra12475e1.pdf]

## Electronic supplementary information for

Growth of carbon nanoshells on tungsten carbide for loading Pt with enhanced electrocatalytic activity and stable anti-poisoning performance

*Bao Jun Han,<sup>a</sup> Zhi Juan Huang,<sup>a</sup> Gao Wu,<sup>b</sup> Cai Ying Zhou,<sup>b</sup> Ye Sheng Li,<sup>\*b</sup> Qing Hui Wang,<sup>b</sup> Yu Long Zhang,<sup>c</sup> Yan Hong Yin,<sup>b</sup> Zi Ping Wu<sup>\*b</sup>*

<sup>a</sup> School of Chemistry and Chemical Engineering, Gannan Normal University,  
Economic & Technological Development Zone, Ganzhou, Jiangxi Province 341000,  
(P. R. China)

<sup>b</sup> School of Materials Science and Engineering, Jiangxi University of Science and  
Technology, 86 Hong Qi Road, Ganzhou 341000, P. R. China

<sup>c</sup> School of Materials Science and Engineering, Guilin University of technology, 12  
Jiangan Road, Guilin 541004, P. R. China

\* Corresponding author. Tel: +86-797-8312422. Fax: +86-797-8312422.

E-mail: ysli@jxust.edu.cn (Y. S. Li), wuziping724@jxust.edu.cn (Z. P. Wu)

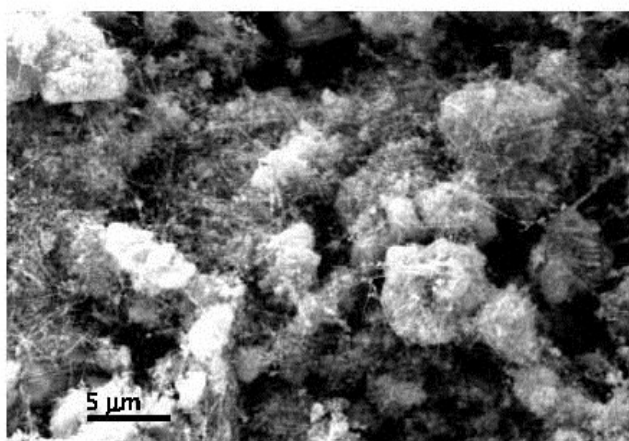

Fig. S1 The microstructures of the prepared H<sub>2</sub>WO<sub>4</sub> examined by SEM (the molar ratio of the tungsten precursor and DWCNTs (W:C) is 15:1)

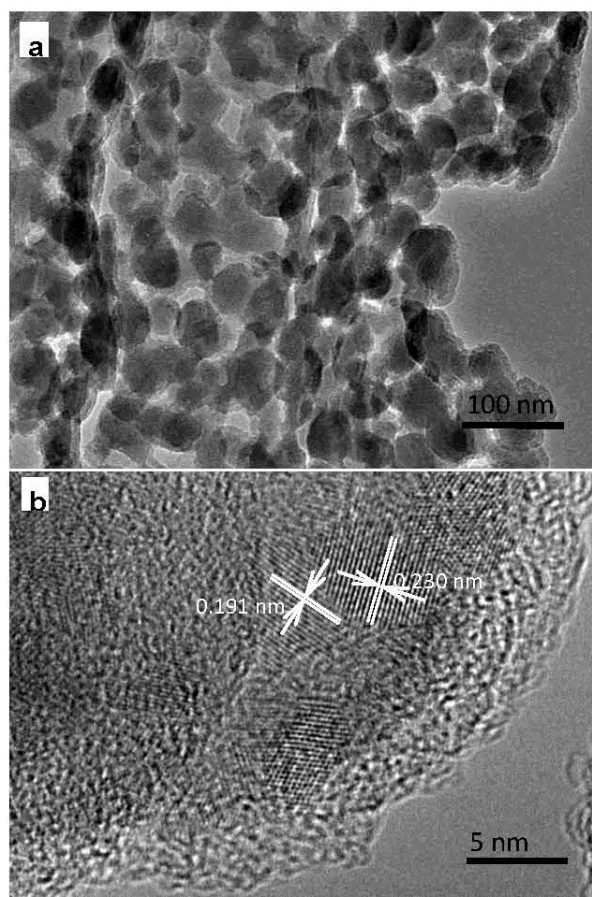

Fig. S2 The typical TEM (a) and HRTEM (b) images of the  $\text{WO}_3$  after carbonized at 900 °C

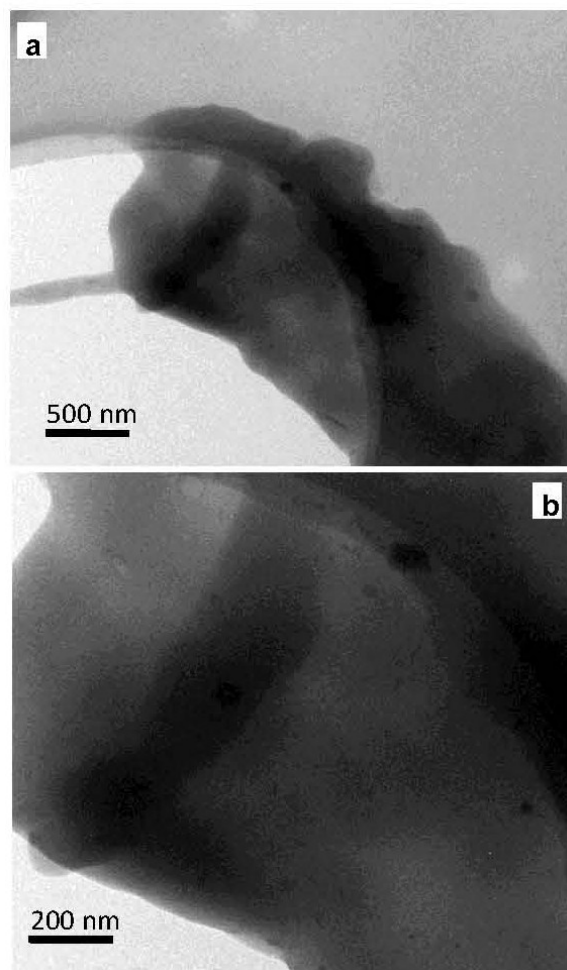

Fig. S3 Thick graphitic carbon layer formed in the samples as the methanol was not added to carbon sources

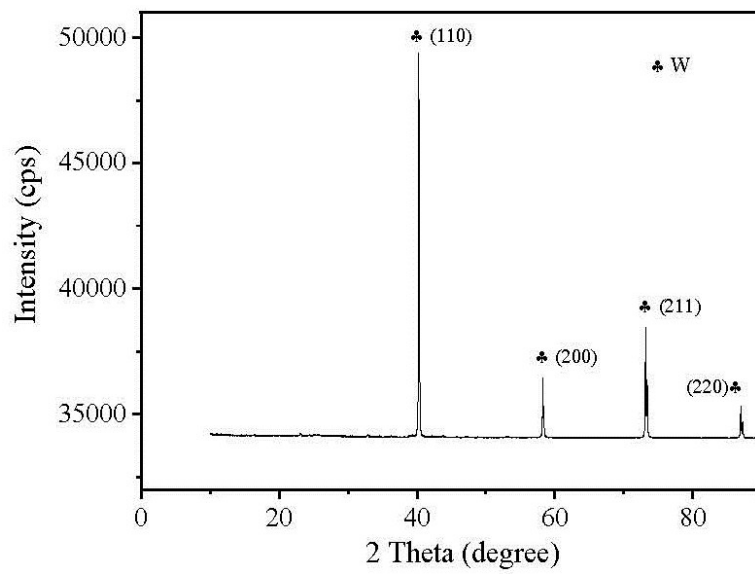

Fig. S4 XRD patterns of the  $\text{WO}_3$  after carbonized at 950 °C with methanol as carbon sources

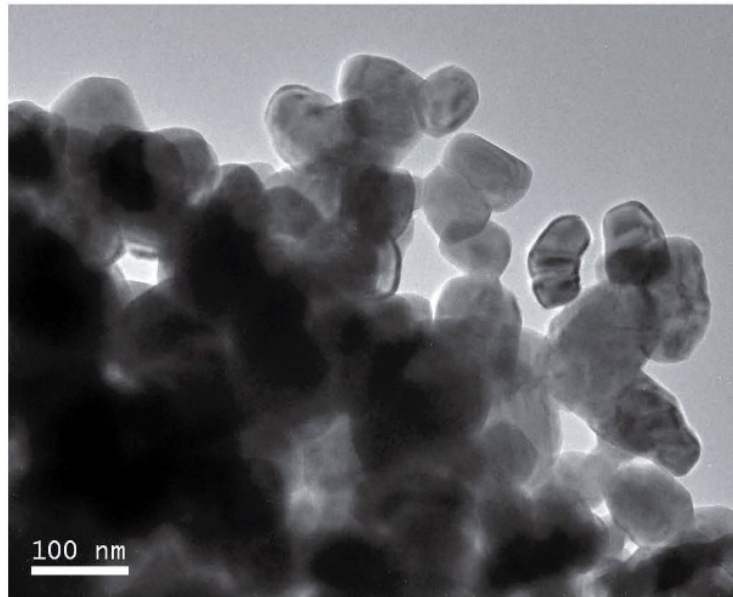

Fig. S5 The morphology of the WC-CNS composite after the hydrogen was supplied into the reaction chamber

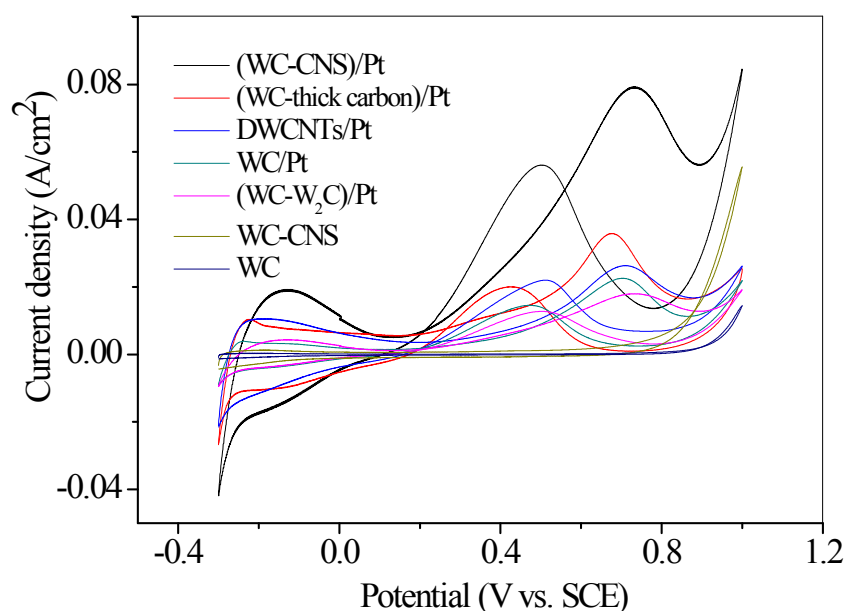

Fig. S6 CV curves of different catalysts in 1 M CH<sub>3</sub>OH and 0.5 M H<sub>2</sub>SO<sub>4</sub> at a scanning rate of 100 mv · s<sup>-1</sup>. Note: Pt loading on the working electrode was controlled to be 0.2 mg cm<sup>-2</sup>

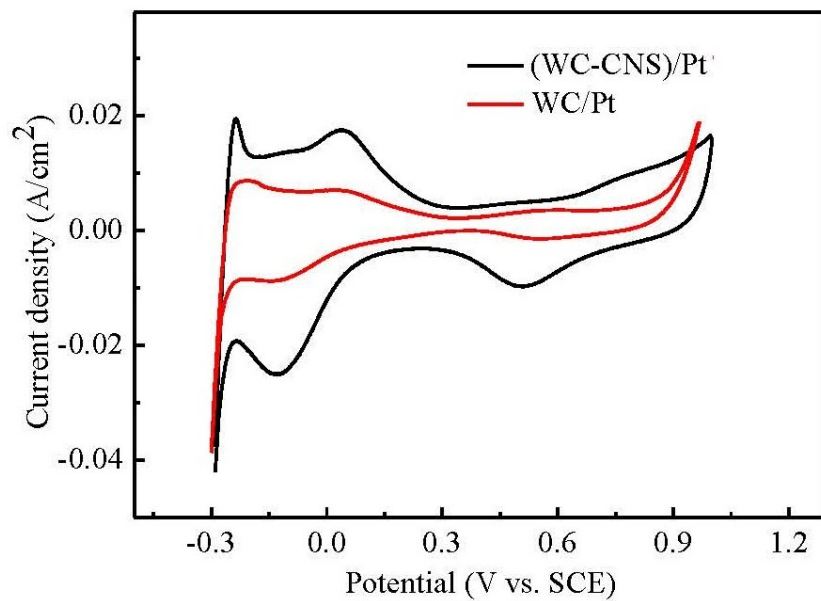

Fig. S7 CV curves of (WC-CNS)/Pt and WC/Pt catalysts in  $\text{H}_2\text{SO}_4$  at a scanning rate of  $100 \text{ mV} \cdot \text{s}^{-1}$ . Note: Pt loading on the working electrode was controlled to be  $0.2 \text{ mg cm}^{-2}$



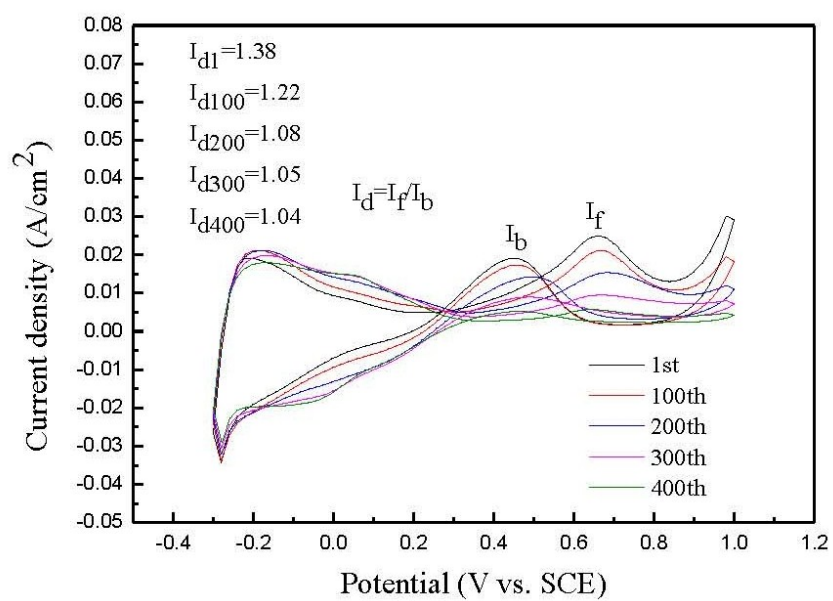

Fig. S8 CV curves of WC/Pt catalyst after different cycles at a scanning rate of  $100 \text{ mv} \cdot \text{s}^{-1}$ . Note: Pt loading on the working electrode was controlled to be  $0.2 \text{ mg cm}^{-2}$

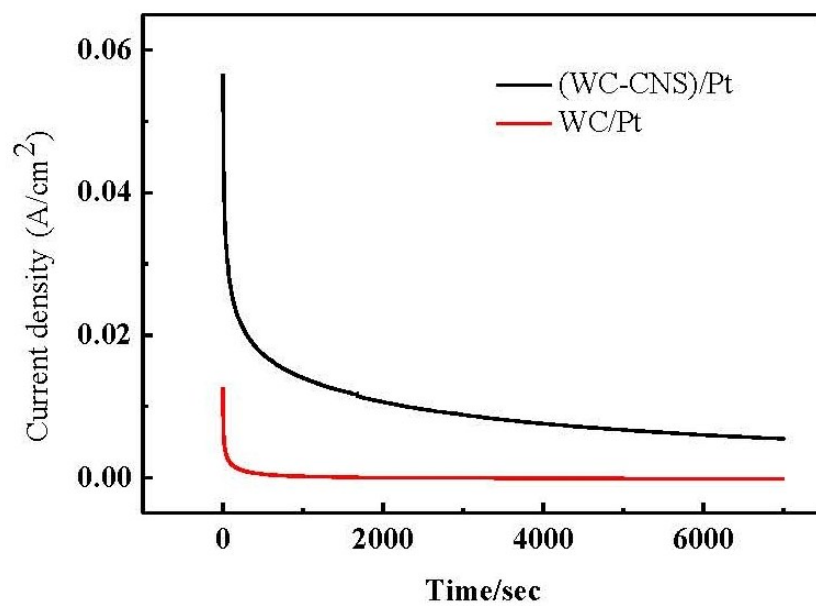

Fig. S9 CA curves of (WC-CNS)/Pt and WC-Pt in 1 M CH<sub>3</sub>OH and 0.5 M H<sub>2</sub>SO<sub>4</sub> solution at potential of 0.7 V for 7000 s
